# Supplementary material for: Molecular Analysis of Full-Length VP2 of Canine Parvovirus Reveals Antigenic Drift in CPV-2b and CPV-2c Variants in Central Chile
Source: MDPI journal article supplement (doi:10.3390/ani11082387), 2021-08-12
Supplement: s1 [file s1]

**Supplementary Table S1.** Number of GenBank accesses and geographical location of the different samples included in the dataset.

| Number | Virus type     | Country   | GenBank<br>Accession number | Number | Virus type | Country     | GenBank<br>Accession number |
|--------|----------------|-----------|-----------------------------|--------|------------|-------------|-----------------------------|
| 1      | FPV            | N.A.      | KU248464                    | 41     | CPV-2c     | Ecuador     | MF177275                    |
| 2      | Vaccine CPV-2  | N.A.      | FJ197846                    | 42     | CPV-2c     | Ecuador     | MF177279                    |
| 3      | Vaccine CPV-2  | N.A.      | FJ197847                    | 43     | CPV-2a     | USA         | MN451661                    |
| 4      | Vaccine CPV-2  | N.A.      | FJ011097                    | 44     | CPV-2a     | USA         | MN451667                    |
| 5      | Vaccine CPV-2  | N.A.      | FJ011098                    | 45     | CPV-2a     | USA         | AY742953                    |
| 6      | Vaccine CPV-2b | N.A.      | FJ222822                    | 46     | CPV-2b     | USA         | JX47524                     |
| 7      | CPV-2b         | Argentina | JF414817                    | 47     | CPV-2c     | USA         | JX475243                    |
| 8      | CPV-2b         | Argentina | MF177246                    | 48     | CPV-2c     | USA         | FJ005235                    |
| 9      | CPV-2c         | Argentina | JF414818                    | 49     | CPV-2c     | USA         | FJ005236                    |
| 10     | CPV-2c         | Argentina | JF414819                    | 50     | CPV-2c     | USA         | JX475250                    |
| 11     | CPV-2c         | Argentina | JF414820                    | 51     | CPV-2c     | USA         | JX475252                    |
| 12     | CPV-2c         | Argentina | JF414821                    | 52     | CPV-2c     | Germany     | FJ005199                    |
| 13     | CPV-2c         | Argentina | JF414824                    | 53     | CPV-2a     | Italy       | MG434739                    |
| 14     | CPV-2c         | Argentina | JF414825                    | 54     | CPV-2a     | Italy       | MF177231                    |
| 15     | CPV-2c         | Argentina | JF414826                    | 55     | CPV-2a     | Italy       | MF177233                    |
| 16     | CPV-2a         | Uruguay   | KC196114                    | 56     | CPV-2b     | Italy       | MF177232                    |
| 17     | CPV-2c         | Uruguay   | KC196112                    | 57     | CPV-2c     | Italy       | FJ005195                    |
| 18     | CPV-2c         | Uruguay   | KC196089                    | 58     | CPV-2c     | Spain       | FJ005214                    |
| 19     | CPV-2c         | Uruguay   | KC196092                    | 59     | CPV-2c     | France      | DQ025951                    |
| 20     | CPV-2c         | Uruguay   | KC196093                    | 60     | CPV-2c     | Belgium     | FJ005247                    |
| 21     | CPV-2c         | Uruguay   | KC196091                    | 61     | CPV-2b     | Portugal    | KR559895                    |
| 22     | CPV-2b         | Brazil    | MF177251                    | 62     | CPV-2b     | Portugal    | KR559892                    |
| 23     | CPV-2b         | Brazil    | EU659119                    | 63     | CPV-2a     | China       | GU569946                    |
| 24     | CPV-2b         | Brazil    | EU659120                    | 64     | CPV-2b     | China       | KR611492                    |
| 25     | CPV-2b         | Brazil    | MK344439                    | 65     | CPV-2b     | China       | JQ743891                    |
| 26     | CPV-2b         | Brazil    | MK344465                    | 66     | CPV-2c     | China       | MF467225                    |
| 27     | CPV-2b         | Brazil    | MK344441                    | 67     | CPV-2c     | China       | MF467242                    |
| 28     | CPV-2b         | Brazil    | MK344470                    | 68     | CPV-2c     | China       | KY386853                    |
| 29     | CPV-2c         | Brazil    | MF177257                    | 69     | CPV-2a     | South Korea | EU009200                    |
| 30     | CPV-2c         | Brazil    | MK344459                    | 70     | CPV-2a     | South Korea | FJ197838                    |
| 31     | CPV-2c         | Brazil    | MK344446                    | 71     | CPV-2b     | Taiwan      | JX048607                    |
| 32     | CPV-2c         | Brazil    | MK344448                    | 72     | CPV-2c     | Taiwan      | KU244254                    |
| 33     | CPV-2c         | Brazil    | MF177255                    | 73     | CPV-2c     | Taiwan      | KX421787                    |
| 34     | CPV-2a         | Ecuador   | KF149977                    | 74     | CPV-2a     | Nigeria     | MK895483                    |
| 35     | CPV-2a         | Ecuador   | KF149973                    | 75     | CPV-2a     | Nigeria     | MK895484                    |
| 36     | CPV-2b         | Ecuador   | MF177280                    | 76     | CPV-2a     | Nigeria     | MK895485                    |
| 37     | CPV-2b         | Ecuador   | KF149985                    | 77     | CPV-2c     | Nigeria     | MK895488                    |
| 38     | CPV-2b         | Ecuador   | MF177269                    | 78     | CPV-2c     | Nigeria     | MK895486                    |
| 39     | CPV-2c         | Ecuador   | KF149962                    | 79     | CPV-2c     | Nigeria     | MK895487                    |

|                                                                           |        |         |          |    |        |         |          |
|---------------------------------------------------------------------------|--------|---------|----------|----|--------|---------|----------|
| 40                                                                        | CPV-2c | Ecuador | KF149967 | 80 | CPV-2c | Nigeria | MK895490 |
| N.A: does not apply to reference vaccines and feline panleukopenia virus. |        |         |          |    |        |         |          |

**Supplementary Table S2.** Number of GenBank accesses and geographical location of the different samples included for the CPV-2b and CPV-2c sub-datasets.

| Subdataset CPV-2b |            |           |                             | Subdataset CPV-2c |            |           |                             |
|-------------------|------------|-----------|-----------------------------|-------------------|------------|-----------|-----------------------------|
| Number/<br>ID     | Virus type | Country   | GenBank<br>Accession number | Number<br>/ID     | Virus type | Country   | GenBank<br>Accession number |
| 1                 | CPV-2b     | Argentina | JF414817                    | 1                 | CPV-2c     | Argentina | JF414818                    |
| 2                 | CPV-2b     | Argentina | MF177246                    | 4                 | CPV-2c     | Argentina | JF414819                    |
| 3                 | CPV-2b     | Brazil    | MF177251                    | 5                 | CPV-2c     | Argentina | JF414820                    |
| 4                 | CPV-2b     | USA       | EU659119                    | 6                 | CPV-2c     | Argentina | JF414821                    |
| 5                 | CPV-2b     | USA       | EU659120                    | 7                 | CPV-2c     | Argentina | JF414824                    |
| 6                 | CPV-2b     | Brazil    | MK344439                    | 8                 | CPV-2c     | Argentina | JF414825                    |
| 7                 | CPV-2b     | Brazil    | MK344465                    | 9                 | CPV-2c     | Argentina | JF414826                    |
| 8                 | CPV-2b     | Brazil    | MK344441                    | 10                | CPV-2c     | Uruguay   | KC196112                    |
| 9                 | CPV-2b     | Brazil    | MK344470                    | 11                | CPV-2c     | Uruguay   | KC196089                    |
| 10                | CPV-2b     | Ecuador   | MF177280                    | 12                | CPV-2c     | Uruguay   | KC196092                    |
| 11                | CPV-2b     | Ecuador   | KF149985                    | 13                | CPV-2c     | Uruguay   | KC196093                    |
| 12                | CPV-2b     | Ecuador   | MF177269                    | 14                | CPV-2c     | Uruguay   | KC196091                    |
| 13                | CPV-2b     | USA       | JX47524                     | 15                | CPV-2c     | Brazil    | MF177257                    |
| 14                | CPV-2b     | Italy     | MF177232                    | 16                | CPV-2c     | Brazil    | MK344459                    |
| 15                | CPV-2b     | Portugal  | KR559895                    | 17                | CPV-2c     | Brazil    | MK344446                    |
| 16                | CPV-2b     | Portugal  | KR559892                    | 18                | CPV-2c     | Brazil    | MK344448                    |
| 17                | CPV-2b     | China     | KR611492                    | 19                | CPV-2c     | Brazil    | MF177255                    |
| 18                | CPV-2b     | China     | JQ743891                    | 20                | CPV-2c     | Ecuador   | KF149962                    |
| 19                | CPV-2b     | Taiwan    | JX048607                    | 21                | CPV-2c     | Ecuador   | KF149967                    |
| 16P-CL            | CPV-2b     | Chile     | MT585712                    | 22                | CPV-2c     | Ecuador   | MF177275                    |
| 33P-CL            | CPV-2b     | Chile     | MT585713                    | 23                | CPV-2c     | Ecuador   | MF177279                    |
|                   |            |           |                             | 24                | CPV-2c     | USA       | JX475243                    |
|                   |            |           |                             | 25                | CPV-2c     | USA       | FJ005235                    |
|                   |            |           |                             | 26                | CPV-2c     | USA       | FJ005236                    |
|                   |            |           |                             | 27                | CPV-2c     | USA       | JX475250                    |
|                   |            |           |                             | 28                | CPV-2c     | USA       | JX475252                    |
|                   |            |           |                             | 29                | CPV-2c     | Germany   | FJ005199                    |
|                   |            |           |                             | 30                | CPV-2c     | Italy     | FJ005195                    |
|                   |            |           |                             | 31                | CPV-2c     | Spain     | FJ005214                    |
|                   |            |           |                             | 32                | CPV-2c     | France    | DQ025951                    |
|                   |            |           |                             | 33                | CPV-2c     | Belgium   | FJ005247                    |
|                   |            |           |                             | 34                | CPV-2c     | China     | MF467225                    |
|                   |            |           |                             | 35                | CPV-2c     | China     | MF467242                    |
|                   |            |           |                             | 36                | CPV-2c     | China     | KY386853                    |
|                   |            |           |                             | 37                | CPV-2c     | Taiwan    | KU244254                    |

|    |        |         |          |
|----|--------|---------|----------|
| 38 | CPV-2c | Taiwan  | KX421787 |
| 39 | CPV-2c | Nigeria | MK895488 |
| 40 | CPV-2c | Nigeria | MK895486 |
| 41 | CPV-2c | Nigeria | MK895487 |
| 42 | CPV-2c | Nigeria | MK895490 |
| 43 | 2P-CL  | Chile   | MT585703 |
| 44 | 5P-CL  | Chile   | MT585702 |
| 45 | 9P-CL  | Chile   | MT585700 |
| 46 | 11P-CL | Chile   | MT585698 |
| 47 | 13P-CL | Chile   | MT585709 |
| 48 | 18P-CL | Chile   | MT585708 |
| 49 | 22P-CL | Chile   | MT585710 |
| 50 | 26P-CL | Chile   | MT585705 |
| 51 | 27P-CL | Chile   | MT585706 |
| 52 | 29P-CL | Chile   | MT585711 |
| 53 | 35P-CL | Chile   | MT585701 |
| 54 | 49P-CL | Chile   | MT585697 |
| 55 | 56P-CL | Chile   | MT585707 |
| 56 | 60P-CL | Chile   | MT585704 |
| 57 | 83P-CL | Chile   | MT585696 |
| 58 | 87P-CL | Chile   | MT585699 |

---

**Supplementary Table S3.** General history of canines in study.

| Sample identification | Breed                    | Age (months) | Vaccination status    | Status of CPV | Amplification VP2 (bp) | Antigenic variant CPV-2 |
|-----------------------|--------------------------|--------------|-----------------------|---------------|------------------------|-------------------------|
| 1P-CL                 | Mixed breed              | 3,5          | Unknown               | +             | 719                    | Undetermined            |
| <b>2P-CL</b>          | <b>German Shepherd</b>   | <b>3</b>     | <b>Incomplete</b>     | +             | <b>1755</b>            | <b>CPV-2c</b>           |
| 3P-CL                 | Mixed breed              | 2            | Unknown               | +             | 719                    | Undetermined            |
| 4P-CL                 | Mixed breed              | 2            | Unknown               | +             | 719                    | Undetermined            |
| <b>5P-CL</b>          | <b>Mixed breed</b>       | <b>2,5</b>   | <b>Incomplete</b>     | +             | <b>1755</b>            | <b>CPV-2c</b>           |
| 6P-CL                 | Mixed breed              | 12           | No vaccination        | -             | -                      | Negative                |
| 7P-CL                 | Mixed breed              | 10           | Incomplete            | -             | -                      | Negative                |
| 8P-CL                 | Mixed breed              | 6            | No vaccination        | -             | -                      | Negative                |
| <b>9P-CL</b>          | <b>Mixed breed</b>       | <b>3</b>     | <b>No vaccination</b> | +             | <b>1755</b>            | <b>CPV-2c</b>           |
| 10P-CL                | Mixed breed              | 5            | Complete              | +             | 719                    | Undetermined            |
| <b>11P-CL</b>         | <b>Dachshund</b>         | <b>2</b>     | <b>No vaccination</b> | +             | <b>1755</b>            | <b>CPV-2c</b>           |
| 12P-CL                | Mixed breed              | 48           | Unknown               | -             | -                      | Negative                |
| 13P-CL                | Mixed breed              | 12           | No vaccination        | +             | <b>1755</b>            | <b>CPV-2c</b>           |
| 14P-CL                | Mixed breed              | 72           | Unknown               | -             | -                      | Negative                |
| 15P-CL                | Golden Retriever         | 2            | Unknown               | -             | -                      | Negative                |
| <b>16P-CL</b>         | <b>Yorkshire Terrier</b> | <b>3</b>     | <b>Unknown</b>        | +             | <b>1755</b>            | <b>CPV-2b</b>           |
| 17P-CL                | Mixed breed              | 5            | No vaccination        | -             | -                      | Negative                |
| <b>18P-CL</b>         | <b>Mixed breed</b>       | <b>3</b>     | <b>No vaccination</b> | +             | <b>1755</b>            | <b>CPV-2c</b>           |
| 19P-CL                | Mixed breed              | 3            | No vaccination        | +             | 719                    | Undetermined            |
| 20P-CL                | Poodle                   | 2            | No vaccination        | +             | 719                    | Undetermined            |
| 21P-CL                | Mixed breed              | 2            | Unknown               | -             | -                      | Negative                |
| <b>22P-CL</b>         | <b>Poodle</b>            | <b>3</b>     | <b>Incomplete</b>     | +             | <b>1755</b>            | <b>CPV-2c</b>           |
| 23P-CL                | Malinois Shepherd        | 4            | Incomplete            | +             | 719                    | Undetermined            |
| 24P-CL                | Mixed breed              | 108          | Incomplete            | -             | -                      | Negative                |

|               |                           |            |                   |   |             |               |
|---------------|---------------------------|------------|-------------------|---|-------------|---------------|
| 25P-CL        | Mixed breed               | 7          | No vaccination    | + | 719         | Undetermined  |
| <b>26P-CL</b> | <b>Dachshund</b>          | <b>1,5</b> | <b>Incomplete</b> | + | <b>1755</b> | <b>CPV-2c</b> |
| <b>27P-CL</b> | <b>Basset Hound</b>       | <b>7</b>   | <b>Unknown</b>    | + | <b>1755</b> | <b>CPV-2c</b> |
| 28P-CL        | Mixed breed               | 2          | No vaccination    | + | 719         | Undetermined  |
| <b>29P-CL</b> | <b>Mixed breed</b>        | <b>4</b>   | <b>Complete</b>   | + | <b>1755</b> | <b>CPV-2c</b> |
| 30P-CL        | Mixed breed               | 3          | No vaccination    | - | -           | Negative      |
| 31P-CL        | Mixed breed               | 5          | Unknown           | - | -           | Negative      |
| 32P-CL        | Mixed breed               | 4          | No vaccination    | + | 719         | Undetermined  |
| <b>33P-CL</b> | <b>Mixed breed</b>        | <b>6</b>   | <b>Incomplete</b> | + | <b>1755</b> | <b>CPV-2b</b> |
| 34P-CL        | Mixed breed               | 6          | Unknown           | - | -           | Negative      |
| <b>35P-CL</b> | <b>Mixed breed</b>        | <b>3</b>   | <b>Unknown</b>    | + | <b>1755</b> | <b>CPV-2c</b> |
| 36P-CL        | Mixed breed               | 2          | Unknown           | + | 719         | Undetermined  |
| 37P-CL        | Mixed breed               | 2          | Unknown           | - | -           | Negative      |
| 38P-CL        | Mixed breed               | 2          | Unknown           | + | 719         | Undetermined  |
| 39P-CL        | Mixed breed               | 2          | Unknown           | - | -           | Negative      |
| 40P-CL        | Mixed breed               | 2          | Incomplete        | + | 719         | Undetermined  |
| 41P-CL        | Mixed breed               | 2          | No vaccination    | - | -           | Negative      |
| 42P-CL        | Mixed breed               | 2          | No vaccination    | - | -           | Negative      |
| 43P-CL        | Mixed breed               | 3          | No vaccination    | - | -           | Negative      |
| 44P-CL        | Mixed breed               | 18         | No vaccination    | - | -           | Negative      |
| 45P-CL        | Mixed breed               | 3          | No vaccination    | + | 719         | Undetermined  |
| 46P-CL        | Mixed breed               | 12         | Incomplete        | - | -           | Negative      |
| 47P-CL        | German Shepherd           | 3          | No vaccination    | + | 719         | Undetermined  |
| 48P-CL        | Mixed breed               | 96         | No vaccination    | - | -           | Negative      |
| <b>49P-CL</b> | <b>Labrador Retriever</b> | <b>4</b>   | <b>Unknown</b>    | + | <b>1755</b> | <b>CPV-2c</b> |
| 50P-CL        | Mixed breed               | 9          | No vaccination    | + | 719         | Undetermined  |
| 51P-CL        | Mixed breed               | 5          | No vaccination    | + | 719         | Undetermined  |
| 52P-CL        | Yorkshire Terrier         | 5          | Complete          | - | -           | Negative      |
| 53P-CL        | Mixed breed               | 2          | No vaccination    | + | 719         | Undetermined  |

|               |                     |           |                   |          |             |               |
|---------------|---------------------|-----------|-------------------|----------|-------------|---------------|
| 54P-CL        | Mixed breed         | 2         | No vaccination    | +        | 719         | Undetermined  |
| 55P-CL        | Rottweiler          | 7         | Unknown           | +        | 719         | Undetermined  |
| <b>56P-CL</b> | <b>Mixed breed</b>  | <b>14</b> | <b>Incomplete</b> | <b>+</b> | <b>1755</b> | <b>CPV-2c</b> |
| 57P-CL        | Bullterrier         | 2         | No vaccination    | +        | 719         | Undetermined  |
| 58P-CL        | Pitbull             | 3         | Incomplete        | +        | 719         | Undetermined  |
| 59P-CL        | Mixed breed         | 2         | Unknown           | -        | -           | Negative      |
| <b>60P-CL</b> | <b>Mixed breed</b>  | <b>4</b>  | <b>Incomplete</b> | <b>+</b> | <b>1755</b> | <b>CPV-2c</b> |
| 61P-CL        | Yorkshire Terrier   | 12        | Unknown           | -        | -           | Negative      |
| 62P-CL        | Mixed breed         | 2         | No vaccination    | -        | -           | Negative      |
| 63P-CL        | Mixed breed         | 10        | Unknown           | -        | -           | Negative      |
| 64P-CL        | Mixed breed         | 2         | Unknown           | +        | 719         | Undetermined  |
| 65P-CL        | Golden Retriever    | 3         | Incomplete        | +        | 719         | Undetermined  |
| 66P-CL        | Golden Retriever    | 5         | Incomplete        | +        | 719         | Undetermined  |
| 67P-CL        | Chihuahua           | 2         | No vaccination    | +        | 719         | Undetermined  |
| 68P-CL        | German Shepherd     | 4         | No vaccination    | +        | 719         | Undetermined  |
| 69P-CL        | Bullterrier         | 6         | No vaccination    | +        | 719         | Undetermined  |
| 70P-CL        | Mixed breed         | 2         | Unknown           | +        | 719         | Undetermined  |
| 71P-CL        | Mixed breed         | 2         | No vaccination    | +        | 719         | Undetermined  |
| 72P-CL        | Mixed breed         | 8         | No vaccination    | -        | -           | Negative      |
| 73P-CL        | Mixed breed         | 4         | Unknown           | +        | 719         | Undetermined  |
| 74P-CL        | Mixed breed         | 24        | No vaccination    | +        | 719         | Undetermined  |
| 75P-CL        | Dachshund           | 3         | Complete          | +        | 719         | Undetermined  |
| 76P-CL        | Rottweiler          | 4         | Complete          | -        | -           | Negative      |
| 77P-CL        | Dachshund           | 2         | Incomplete        | +        | 719         | Undetermined  |
| 78P-CL        | Mixed breed         | 3         | No vaccination    | -        | -           | Negative      |
| 79P-CL        | Mixed breed         | 3         | Incomplete        | +        | 719         | Undetermined  |
| 80P-CL        | Mixed breed         | 2         | Unknown           | +        | 719         | Undetermined  |
| 81P-CL        | Chilean Fox Terrier | 7         | Incomplete        | +        | 719         | Undetermined  |
| 82P-CL        | Yorkshire Terrier   | 2         | Unknown           | -        | -           | Negative      |
| <b>83P-CL</b> | <b>Mixed breed</b>  | <b>6</b>  | <b>Unknown</b>    | <b>+</b> | <b>1755</b> | <b>CPV-2c</b> |

|               |                       |          |                 |          |             |               |
|---------------|-----------------------|----------|-----------------|----------|-------------|---------------|
| 84P-CL        | Mixed breed           | 7        | No vaccination  | +        | 719         | Undetermined  |
| 85P-CL        | Mixed breed           | 2        | No vaccination  | +        | 719         | Undetermined  |
| 86P-CL        | Mixed breed           | 4        | Incomplete      | -        | -           | Negative      |
| <b>87P-CL</b> | <b>Siberian Husky</b> | <b>3</b> | <b>Complete</b> | <b>+</b> | <b>1755</b> | <b>CPV-2c</b> |
| 88P-CL        | Mixed breed           | 5        | Incomplete      | +        | 719         | Undetermined  |
| 89P-CL        | Mixed breed           | 7        | Incomplete      | +        | 719         | Undetermined  |
| 90P-CL        | Mixed breed           | 6        | No vaccination  | +        | 719         | Undetermined  |
| 91P-CL        | Mixed breed           | 2        | No vaccination  | +        | 719         | Undetermined  |
| 92P-CL        | Chilean Fox Terrier   | 9        | No vaccination  | +        | 719         | Undetermined  |
| 93P-CL        | Mixed breed           | 5        | No vaccination  | +        | 719         | Undetermined  |
| 94P-CL        | Border Collie         | 2        | Incomplete      | +        | 719         | Undetermined  |
| 95P-CL        | Mixed breed           | 2        | Incomplete      | +        | 719         | Undetermined  |
| 96P-CL        | Akita                 | 2        | No vaccination  | -        | -           | Negative      |
| 97P-CL        | Yorkshire Terrier     | 4        | Incomplete      | +        | 719         | Undetermined  |
| 98P-CL        | Mixed breed           | 4        | No vaccination  | +        | 719         | Undetermined  |
| 99P-CL        | Mixed breed           | 11       | Unknown         | -        | -           | Negative      |
| 100P-CL       | Mixed breed           | 5        | Incomplete      | +        | 719         | Undetermined  |

---
